# Supplementary material for: Genome-wide identification and characterization of FAD family genes in barley
Source: PeerJ journal article supplement (doi:10.7717/peerj.16812), 2024-02-29

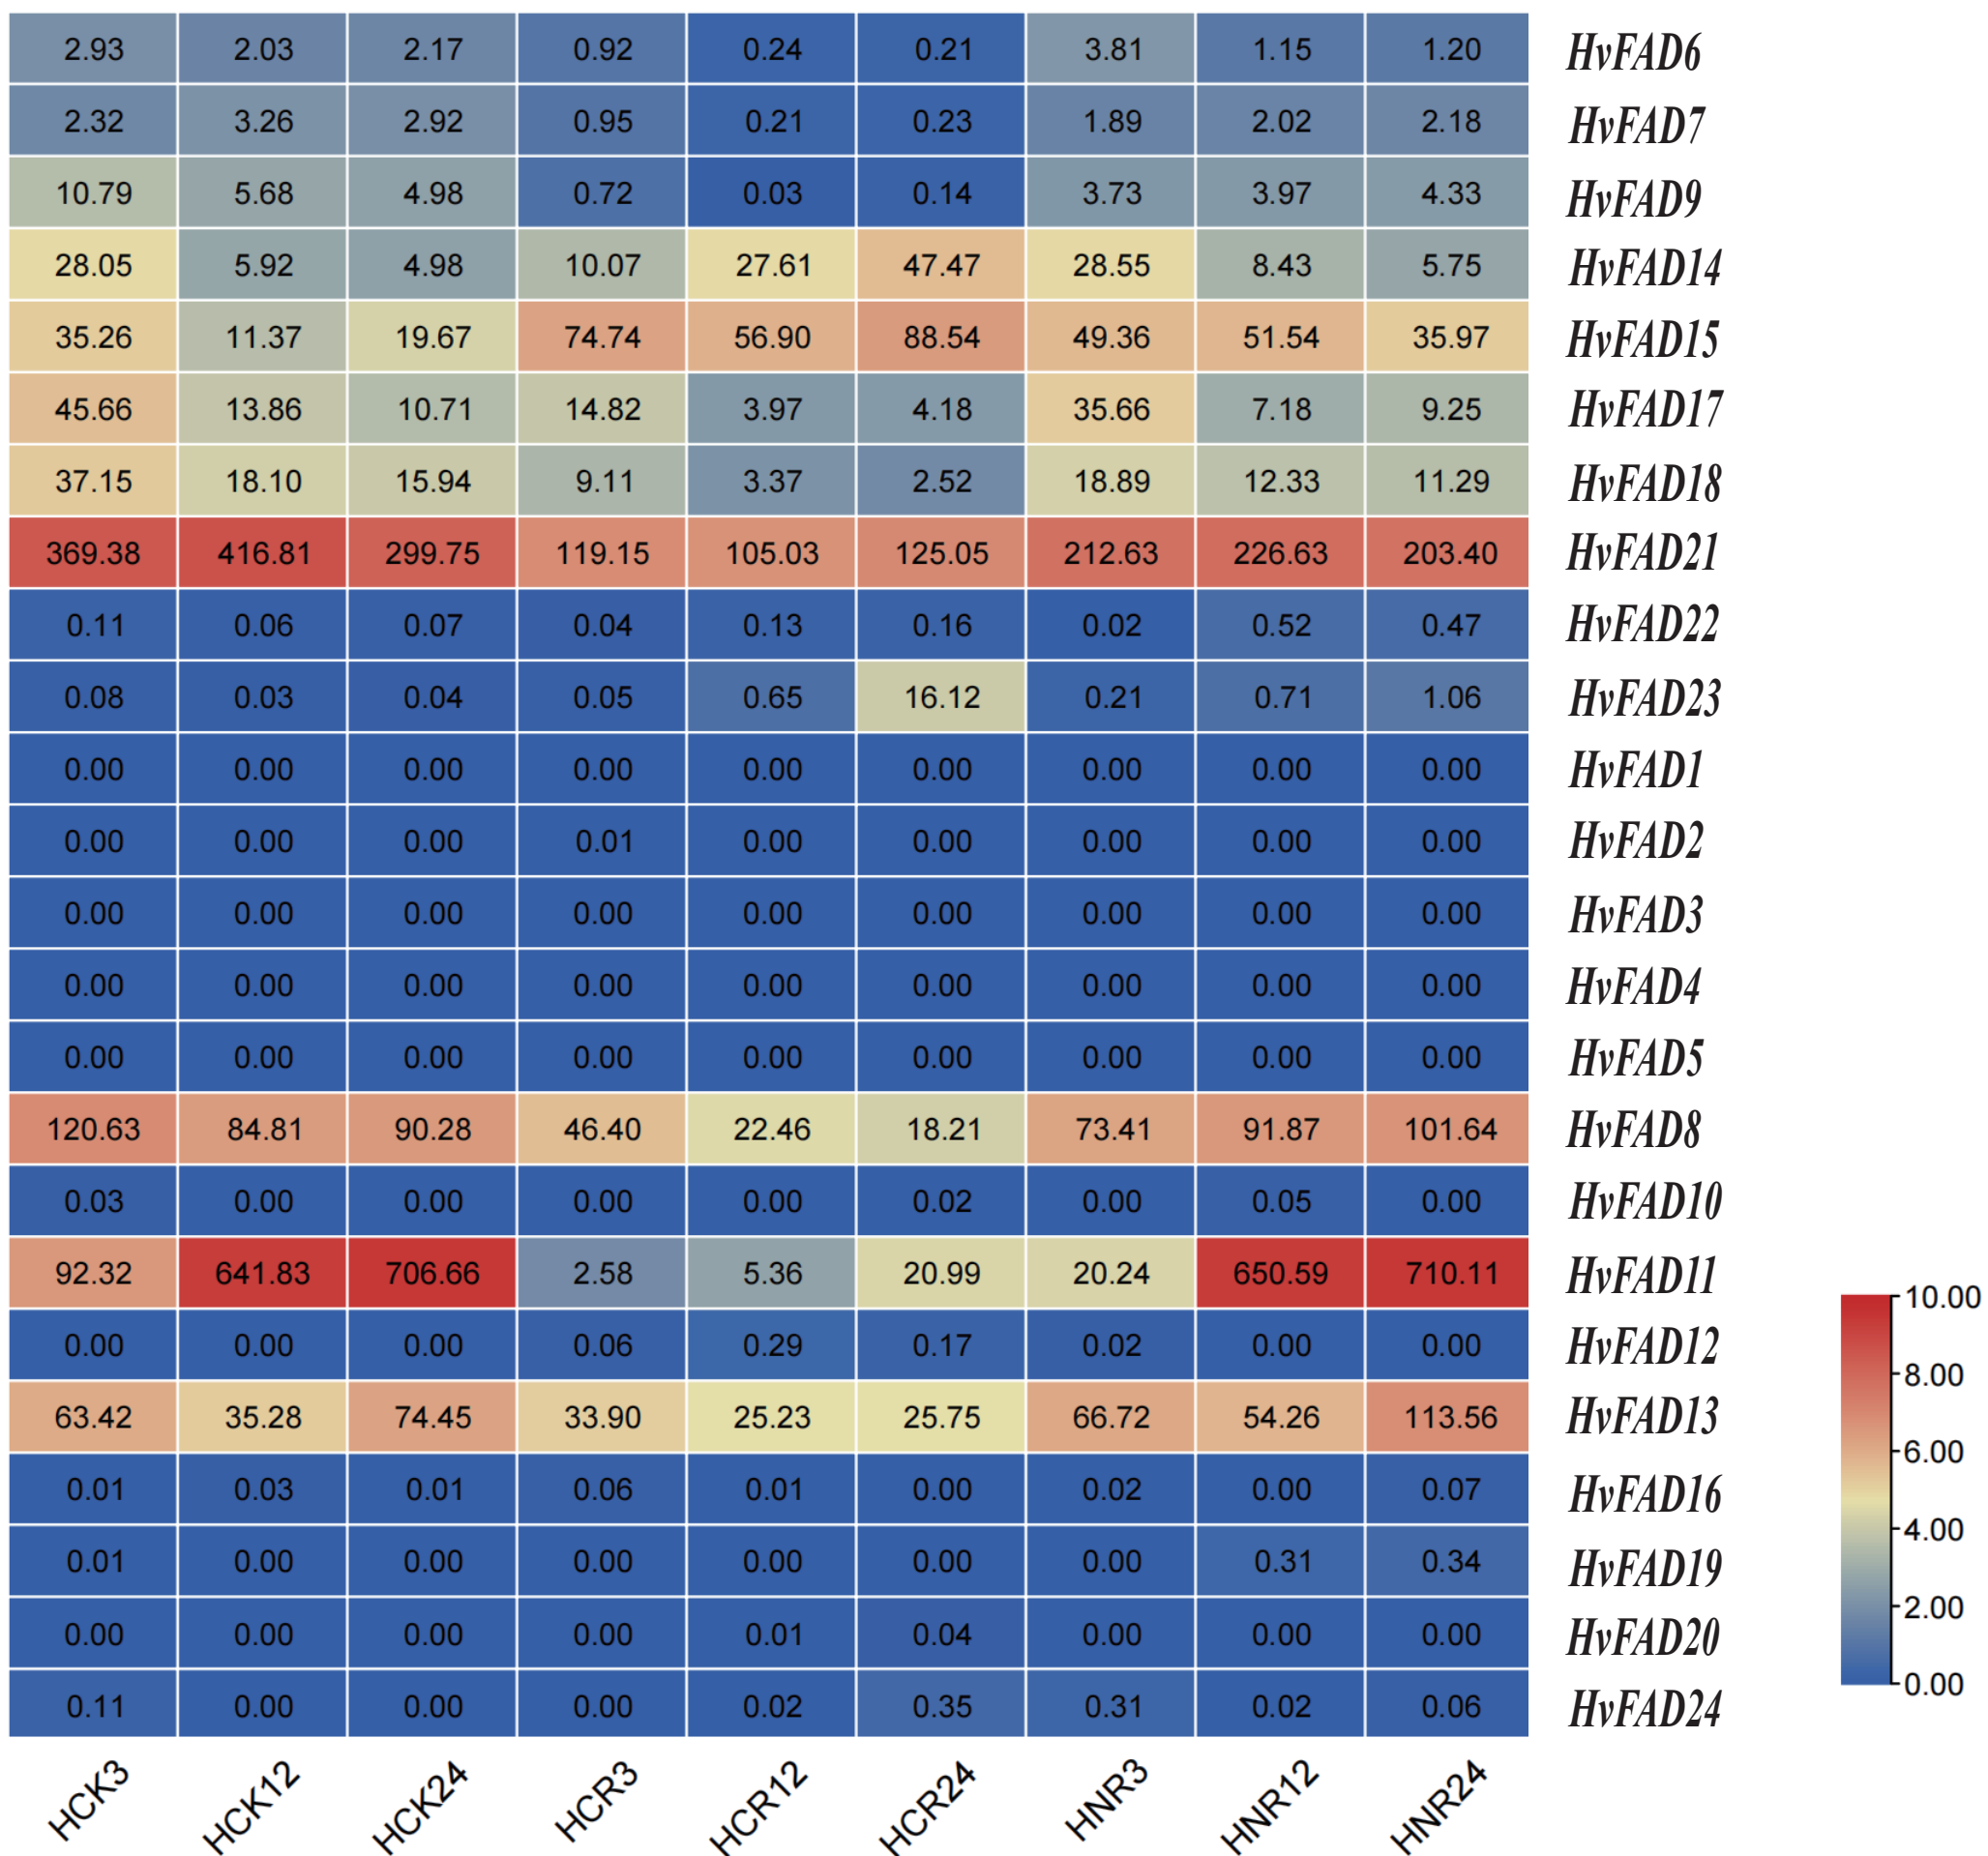

Supplement: HvFADs.pdf [file HvFADs.pdf]
